# Supplementary material for: Future global urban water scarcity and potential solutions
Source: PubMed Central journal article supplement (PMC8333427; doi:10.1038/s41467-021-25026-3), 2021-08-03
Supplement: 41467_2021_25026_MOESM1_ESM.pdf [file 41467_2021_25026_MOESM1_ESM.pdf]

## **Supplementary Information**

### **Future global urban water scarcity and potential solutions**

**Chunyang He<sup>1,2</sup>, Zhifeng Liu<sup>1,2\*</sup>, Jianguo Wu<sup>1,2,3</sup>, Xinhao Pan<sup>1,2</sup>, Zihang Fang<sup>1,2</sup>, Jingwei Li<sup>4</sup>,  
Brett A Bryan<sup>5</sup>**

1 Center for Human-Environment System Sustainability (CHESS), State Key Laboratory of Earth Surface Processes and Resource Ecology (ESPRE), Beijing Normal University, Beijing, 100875, China

2 School of Natural Resources, Faculty of Geographical Science, Beijing Normal University, Beijing, 100875, China

3 School of Life Sciences and School of Sustainability, Arizona State University, Tempe, AZ 85287, USA

4 School of Environmental and Geographical Sciences (SEGS), Shanghai Normal University, Shanghai, 200234, China

5 Centre for Integrative Ecology, Deakin University, Melbourne, VIC3125, Australia

## **Contents**

Supplementary Methods 1. The simulation of global urban land in 2050.

Supplementary Figure 1. Flow chart for estimating urban water scarcity.

Supplementary Figure 2. Framework for selecting potential solutions.

Supplementary Figure 3. Large cities subject to water scarcity in 2050 under four socio-economic and climate change scenarios.

Supplementary Figure 4. Distribution of urban population in different city sizes in 2016.

Supplementary Figure 5. Comparing urban exposure to water scarcity between our study and previous studies.

Supplementary Table 1. Details of the data sources used in this study.

Supplementary Table 2. Details of the global climate models used in this study.

Supplementary Table 3. Details of this study and comparison with previous studies.

Supplementary Table 4. Results of this study and comparison with previous studies.

Supplementary Table 5. Potential solutions for addressing water scarcity of different cities.

Supplementary Table 6. Spatial correlation on future urban expansion area between our estimates and existing datasets.

Supplementary Table 7. Comparison of urban population in cities with different sizes in 2016.

Supplementary Table 8. Impacts of interbasin water transfer on urban population facing water scarcity in 2016.

### **Supplementary Methods 1. The simulation of global urban land in 2050.**

Considering the obvious differences in the natural environments and socioeconomic characteristics in different regions across the world, we applied the zonal simulation approach used by Liu et al. (2019), Chen et al. (2020) and Gao and O'Neill (2020) and the Land Use Scenario Dynamics-urban (LUSD-urban) model to simulate the spatial pattern of global urban land in 2050. The model calculates urban land demand and spatially allocates urban land based on the principle of urban land supply-demand balance (He et al., 2008; 2015).

First, we divided the world into  $100 \text{ km} \times 100 \text{ km}$  grid cells to reflect the differences in urban expansion due to diverse socioeconomic and natural characteristics in different regions. In each grid cell, we obtained the total urban population for 1992-2016 from History Database of the Global Environment (HYDE) and the urban land area for 1992-2016 from He et al. (2019) (Supplementary Table 1), and then constructed a linear regression model using urban land area as the dependent variable and urban population as the independent variable:

$$UL_{t,i} = a_i \cdot UP_{t,i} + b_i \quad (1)$$

where  $UL_{t,i}$  and  $UP_{t,i}$  denote the urban land area and the number of urban population in the  $i$ -th grid cell in year  $t$ , respectively.  $a_i$  and  $b_i$  denote the slope and intercept, respectively.

Then, we calculated the urban land demand in each grid cell based on the linear regression model and urban population data from HYDE in 2050 under different scenarios (Supplementary Table 1). Based on the urban land demand, we used the LUSD-urban model to simulate the spatial allocation of urban land at a 1-km resolution in each grid cell. Specifically, we calculated the probability of all non-urban pixels to be converted to urban pixels in each grid cell. The calculation process can be expressed as:

$$P_{t,k,i,j} = \left( \sum_{n=1}^{m-2} W_n \cdot S_{t,n,i,j} + W_{m-1} \cdot N_{t,i,j} - W_m \cdot I_{t,k,i,j} \right) \cdot \prod_{r=1} EC_{t,r,i,j} \cdot V_{t,i,j} \quad (2)$$

where  $P_{t,k,i,j}$  denotes the probability that each non-urban pixel  $j$  with land cover type  $k$  in grid  $i$  will be converted to an urban pixel in year  $t$ .  $S_{t,n,i,j}$  denotes the normalized score of the suitability factor  $n$ .  $W_n$  denotes the weight of the suitability factor  $n$ . The suitability factors used in this study include elevation, slope, distance to cities with different size (with populations above 10 million, between 5-10 million, between 3-5 million, and between 1-3 million), distance to coastlines, distance to railways and roads, and river density (Supplementary Table 1).  $N_{t,i,j}$  denotes the neighborhood effects,  $W_{m-1}$  denotes the weight of the neighborhood effects.  $I_{t,k,i,j}$  denotes the inheritance effects,  $W_m$  denotes the weight of the inheritance effects.  $EC_{t,r,i,j}$  denotes the ecological restriction, and all the pixels in the protected area have the  $EC_{t,r,i,j}$  value of 0.  $V_{t,i,j}$  denotes the random factor, which can be expressed as:

$$V_{t,i,j} = 1 + [-\ln(rand)]^a \quad (3)$$

where  $rand$  denotes a random variable whose value ranges from 0 to 1, and conforms to a uniform distribution.  $a$  denotes an adjustment factor that controls the degree of random disturbance. Based on He et al. (2008; 2015), the Monte Carlo method was used to calibrate the weights of each grid. Accuracy assessment showed that the simulated global urban land in 2016 had a Kappa coefficient of 0.60, indicating that the zoned LUSD-urban model projections were of sufficient accuracy to simulate the spatial patterns of global urban land. Based on the calibrated model, we simulated the urban expansion in each grid cell from 2016 to 2050. Finally, we obtained the global urban land data, at a spatial resolution of 1 km, in 2050 under different scenarios by integrating the simulation results of all grids.

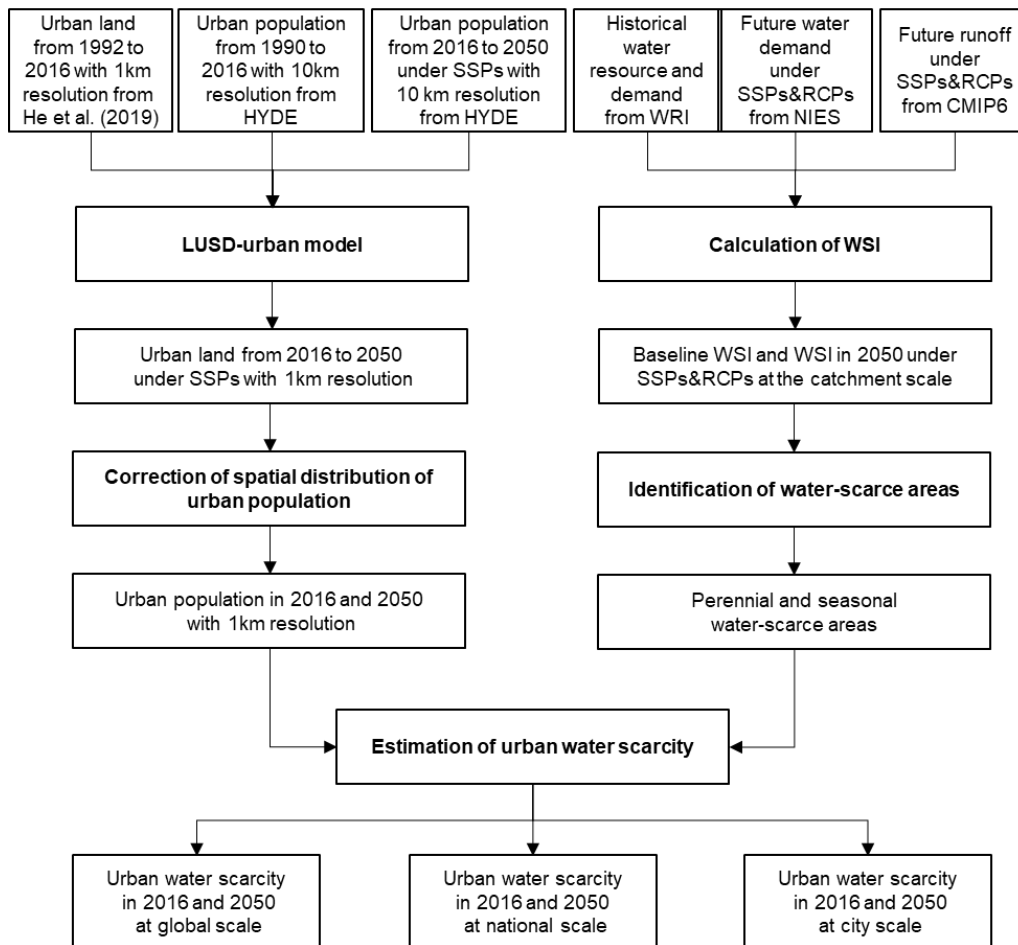

**Supplementary Figure 1. Flow chart for estimating urban water scarcity.** The bold text represents the key steps. The non-bold text represents input or output of these steps.

Note: HYDE = History Database of the Global Environment; SSPs = shared socioeconomic pathways; RCPs = representative concentration pathways; WRI = World Resource Institute; NIER = National Institute of Environmental Research; CMIP6 = Coupled Model Intercomparison Project Phase 6; LUSD = Land Use Scenario Dynamics; WSI = water stress index.

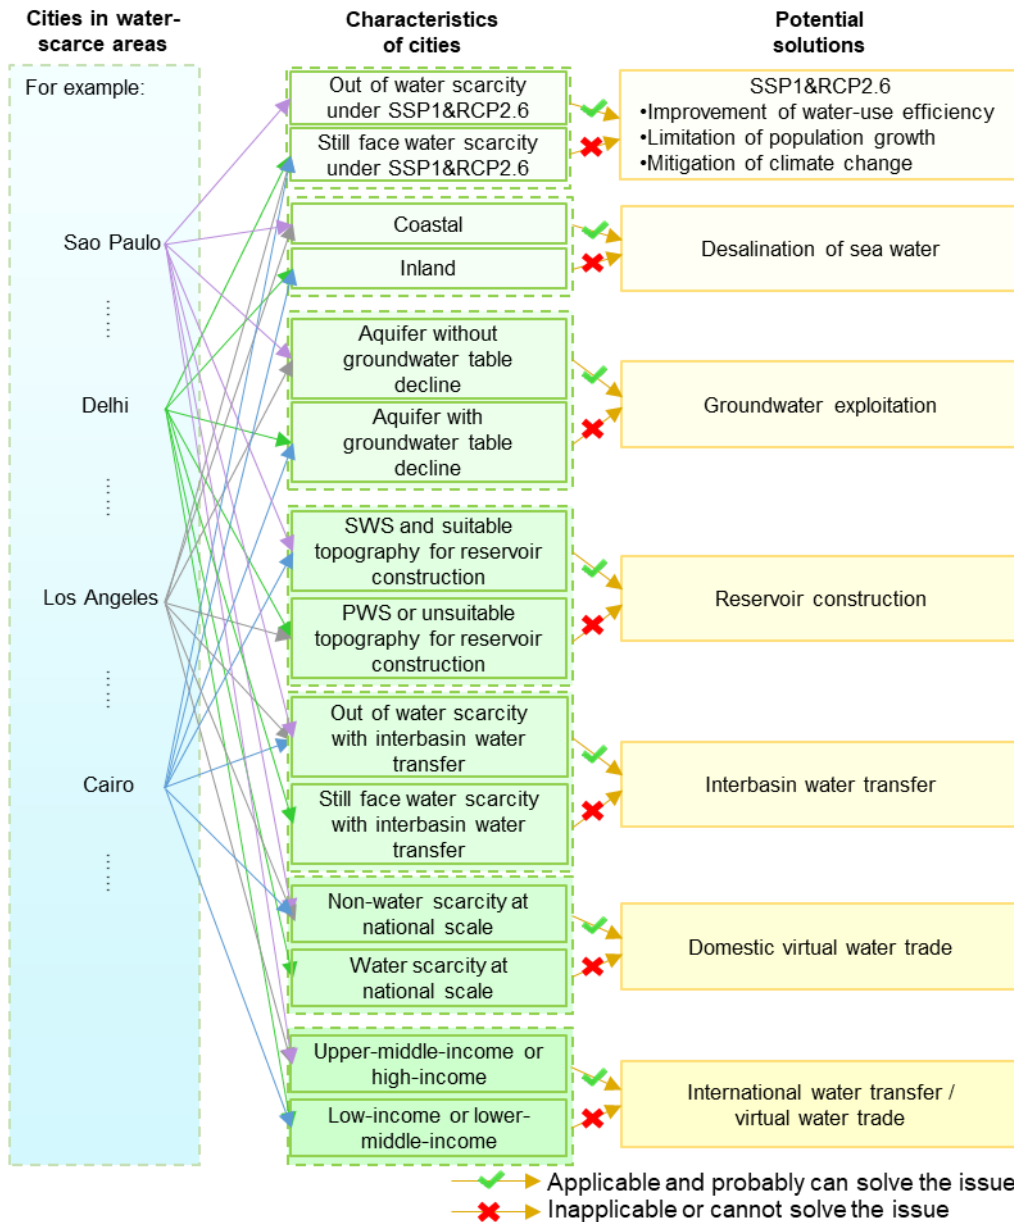

**Supplementary Figure 2. Framework for selecting potential solutions.** For each water-scarce city, the feasibility of potential solutions depends on its characteristics. For example, Sao Paulo can adopt desalination as it is a coastal city, Los Angeles can apply groundwater exploitation since it is located on an aquifer without groundwater table decline, Cairo can implement reservoir construction because it faces seasonal water scarcity and has suitable topography, Delhi is not likely to adopt the listed solutions due to its location and economic development level.

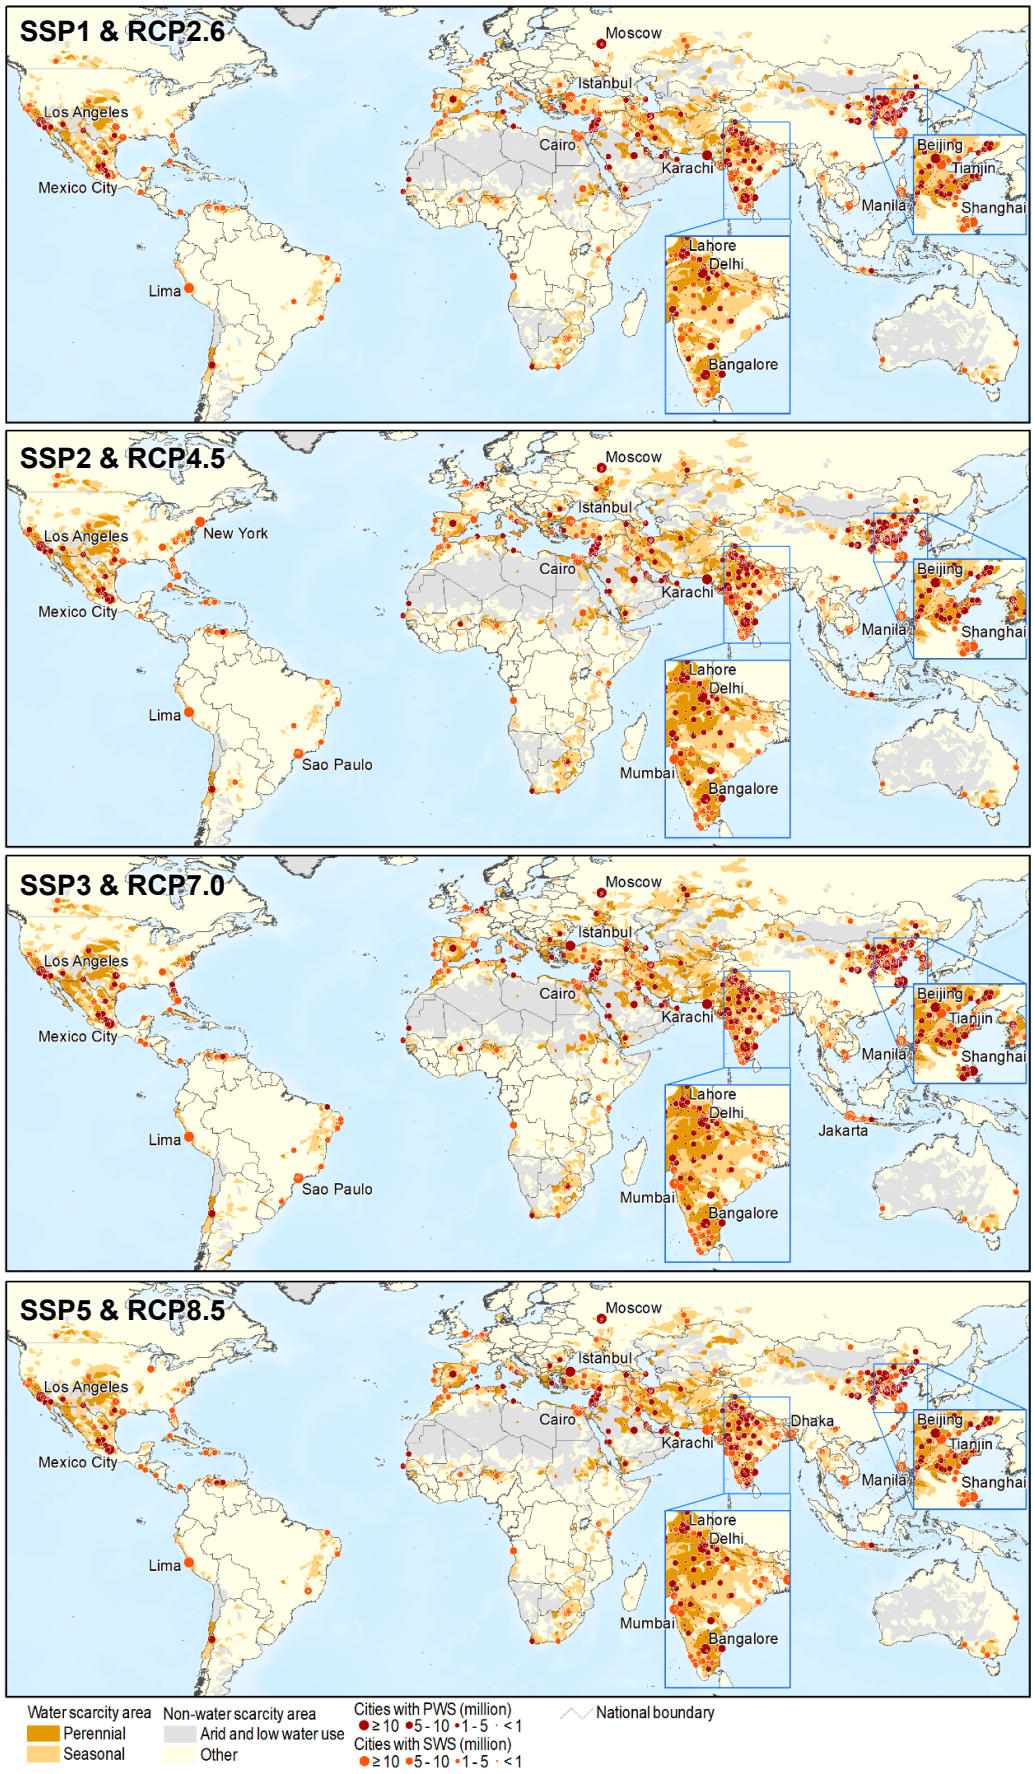

**Supplementary Figure 3. Large cities subject to water scarcity in 2050 under four socio-economic and climate change scenarios.**

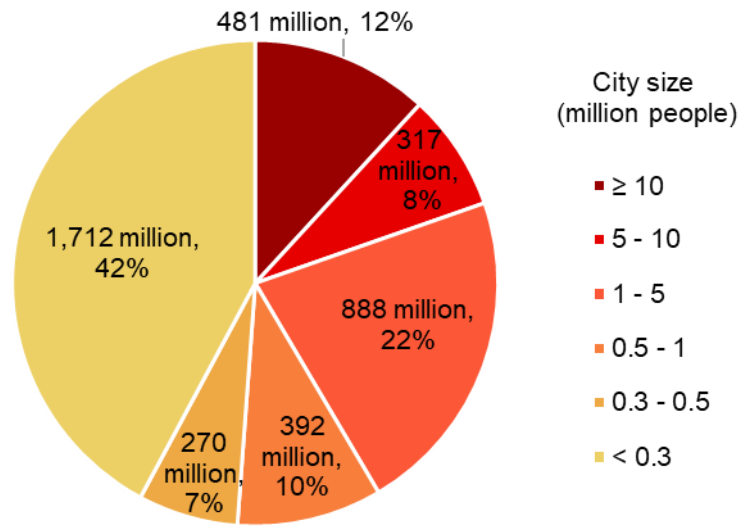

**Supplementary Figure 4. Distribution of urban population in different city sizes in 2016.**



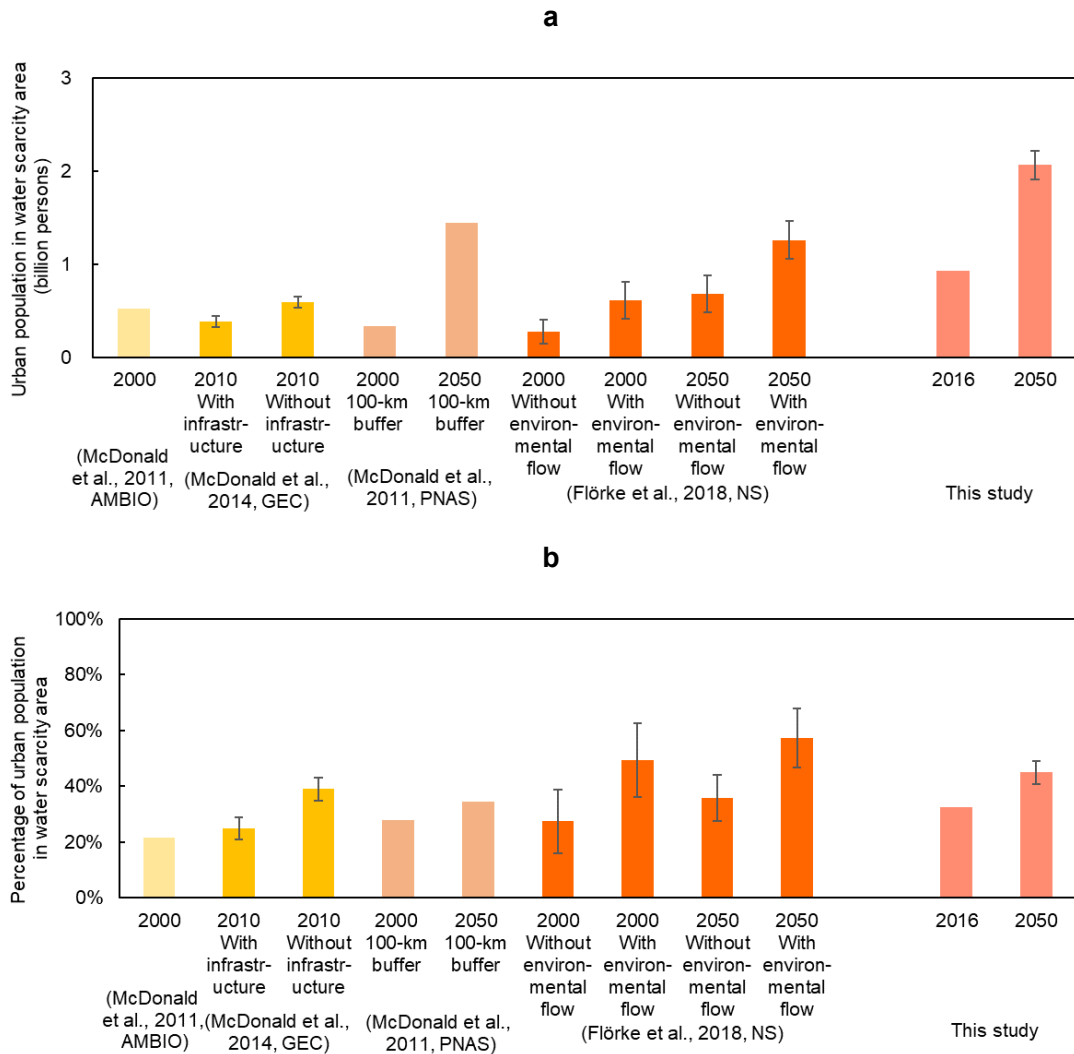

**Supplementary Figure 5. Comparing urban exposure to water scarcity between our study and previous studies.**

- (a) Urban population in water scarcity area.
- (b) Percentage of urban population in water scarcity area.

Note: The assessment results without buffer from McDonald et al. 2011, PNAS was not listed here since such results obviously overestimate the urban population exposed to water scarcity.

**Supplementary Table 1. Details of the data sources used in this study.**

| Data                                                                                                                                                                             | Time period                                               | Spatial resolution (scale) | Scenario                                                           | Data source (Reference)                              | Link                                                                                                                                                                |
|----------------------------------------------------------------------------------------------------------------------------------------------------------------------------------|-----------------------------------------------------------|----------------------------|--------------------------------------------------------------------|------------------------------------------------------|---------------------------------------------------------------------------------------------------------------------------------------------------------------------|
| Global urban population                                                                                                                                                          | 1992-2016<br>2050                                         | 10km                       | N/A<br>SSPs                                                        | HYDE (Klein Goldewijk et al., 2010; 2017)            | <a href="https://themasites.pbl.nl/tridion/en/themasites/hyde/download/index-2.html">https://themasites.pbl.nl/tridion/en/themasites/hyde/download/index-2.html</a> |
| Global urban land-use data                                                                                                                                                       | 1992-2016                                                 | 1km                        |                                                                    | (He et al., 2019)                                    | <a href="https://doi.pangaea.de/10.1594/PANGAEA.892684">https://doi.pangaea.de/10.1594/PANGAEA.892684</a>                                                           |
| Global land-use/land-cover data                                                                                                                                                  | 1992-2015                                                 | 300m                       |                                                                    | ESA                                                  | <a href="http://maps.elie.ucl.ac.be/CCI/viewer/index.php">http://maps.elie.ucl.ac.be/CCI/viewer/index.php</a>                                                       |
| Global digital elevation model                                                                                                                                                   |                                                           | 1km                        |                                                                    | USGS                                                 | <a href="https://lta.cr.usgs.gov/">https://lta.cr.usgs.gov/</a>                                                                                                     |
| Locations of cities with population > 300,000                                                                                                                                    |                                                           |                            |                                                                    | UN                                                   | <a href="https://population.un.org/wup/">https://population.un.org/wup/</a>                                                                                         |
| Global coastline data                                                                                                                                                            |                                                           |                            |                                                                    | NOAA                                                 | <a href="https://www.ngdc.noaa.gov/mgg/shorelines">https://www.ngdc.noaa.gov/mgg/shorelines</a>                                                                     |
| Global highway and railway data                                                                                                                                                  |                                                           |                            |                                                                    | CAS, REDCP                                           | <a href="http://www.resdc.cn">http://www.resdc.cn</a>                                                                                                               |
| Global river network dataset                                                                                                                                                     |                                                           |                            |                                                                    | (Schneider et al., 2017)                             | <a href="https://www.metis.upmc.fr/en/node/375">https://www.metis.upmc.fr/en/node/375</a>                                                                           |
| Global protected area dataset                                                                                                                                                    |                                                           |                            |                                                                    | ProtectedPlanet                                      | <a href="http://www.protectedplanet.net">http://www.protectedplanet.net</a>                                                                                         |
| Global water resources/ withdrawal data (monthly available water resource, monthly water withdrawal and consumption for irrigation, livestock, industrial, and domestic sectors) | 2014<br>(with a 10-year ordinary least square regression) | catchment                  |                                                                    | AQUEDUCT3.0 (Hofste et al., 2019)                    | <a href="https://www.wri.org/resources/data-sets/aqueduct-global-maps-30-data">https://www.wri.org/resources/data-sets/aqueduct-global-maps-30-data</a>             |
| Global water withdrawal data                                                                                                                                                     | 2000<br>2050                                              | 0.5 degree                 | N/A<br>SSP1&RCP2.6,<br>SSP2&RCP4.5,<br>SSP3&RCP6.0,<br>SSP5&RCP8.5 | NIER, Japan (Hanasaki et al., 2013a)                 |                                                                                                                                                                     |
| Global surface and subsurface runoff data                                                                                                                                        | 2005-2014<br>2041-2050                                    | See Supplementary Table 2  | N/A<br>SSP1&RCP2.6,<br>SSP2&RCP4.5,<br>SSP3&RCP7.0,<br>SSP5&RCP8.5 | CMIP6                                                | <a href="https://esgf-node.llnl.gov/search/cmip6/">https://esgf-node.llnl.gov/search/cmip6/</a>                                                                     |
| Global groundwater table data                                                                                                                                                    | 1960-2014                                                 | 5 min                      |                                                                    | AQUEDUCT3.0 (Hofste et al., 2019)                    | <a href="https://www.wri.org/resources/data-sets/aqueduct-global-maps-30-data">https://www.wri.org/resources/data-sets/aqueduct-global-maps-30-data</a>             |
| Global reservoir distribution data                                                                                                                                               |                                                           |                            |                                                                    | GRanD V1.3 (Lehner, 2011)                            | <a href="http://globaldamwatch.org/grand/">http://globaldamwatch.org/grand/</a>                                                                                     |
| Global pumped hydro atlas                                                                                                                                                        |                                                           |                            |                                                                    | RE100 research group of ANU                          | <a href="http://re100.eng.anu.edu.au">http://re100.eng.anu.edu.au</a>                                                                                               |
| Interbasin water transfer data for global cities*                                                                                                                                | 2014                                                      |                            |                                                                    | City water map (Version 2.2) (McDonald et al., 2014) | <a href="https://knbcoinformatics.org/view/doi%3A10.5063%2FF1J67DWR">https://knbcoinformatics.org/view/doi%3A10.5063%2FF1J67DWR</a>                                 |
| List of countries in four income categories                                                                                                                                      | 2020                                                      |                            |                                                                    | World Bank                                           | <a href="https://datahelpdesk.worldbank.org">https://datahelpdesk.worldbank.org</a>                                                                                 |

Note: SSPs = shared socioeconomic pathways, HYDE = History Database of the Global Environment; ESA = European Space Agency; USGS = United States Geological Survey; UN = United Nations; NOAA = National Oceanic and Atmospheric Administration; CAS = Chinese Academy of Sciences; REDCP = Resource and Environmental Data Cloud Platform; NIER = National Institute of Environmental Research; CMIP6 = Coupled Model Intercomparison Project Phase 6; GRanD = Global Reservoir and Dam Database; ANU = Australian National University

\*The data on “South-to-North Water Diversion” were updated according to Water Resources Bulletin in China.

**Supplementary Table 2. Details of the global climate models used in this study.**

| Model         | The ensembles used under different scenarios |             |             |             |           | Country | Institution                                        | Resolution      | Reference                  |
|---------------|----------------------------------------------|-------------|-------------|-------------|-----------|---------|----------------------------------------------------|-----------------|----------------------------|
|               | SSP1-RCP2.6                                  | SPP2-RCP4.5 | SSP3-RCP7.0 | SSP5-RCP8.5 | Sum       |         |                                                    |                 |                            |
| MRI-ESM2-0    | 1                                            | 1           | 5           | 1           | 8         | Japan   | Meteorological Research Institute                  | 1.125°x1.125°   | Yukimoto et al., 2019      |
| MPI-ESM1-2-HR | 1                                            | 2           | 9           | 1           | 13        | Germany | Max Planck Institute for Meteorology               | 0.9375°x0.9375° | Müller et al., 2018        |
| INM-CM5-0     | 1                                            | 1           | 5           | 1           | 8         | Russia  | Institute of Numerical Mathematic                  | 1.5°x2°         | Volodin et al., 2017       |
| GFDL-ESM4     | 1                                            | 1           | 1           | 1           | 4         | America | National Oceanic and Atmospheric Administration    | 1°x1.25°        | Krasting et al., 2018      |
| EC-Earth3-Veg | 4                                            | 4           | 4           | 4           | 16        | Europe  | European Centre for Medium-Range Weather Forecasts | 0.703°x0.703°   | Wyser et al., 2019         |
| EC-Earth3     | 1                                            | 11          | 1           | 1           | 14        |         |                                                    |                 |                            |
| CESM2-WACCM   | 1                                            | 1           | 3           | 1           | 6         | America | National Center for Atmospheric Research           | 0.9375°x1.25°   | Gettelman et al., 2019a; b |
| CESM2         | 2                                            | 3           | 2           | 2           | 9         |         |                                                    |                 |                            |
| CAMS-CSM1-0   | 1                                            | 1           | 1           | 1           | 4         | China   | Chinese Academy of Meteorological Sciences         | 1.125°x1.125°   | Rong et al., 2019          |
| BCC-CSM2-MR   | 1                                            | 1           | 1           | 1           | 4         | China   | National Climate Center                            | 1.125°x1.125°   | Xin et al., 2019           |
| <b>Total</b>  | <b>14</b>                                    | <b>26</b>   | <b>32</b>   | <b>14</b>   | <b>86</b> |         |                                                    |                 |                            |

**Supplementary Table 3. Details of this study and comparison with previous studies.**

|                                          | Object                       | Extent                                              | Water scarcity assessment                                    | Future water scarcity | Scenario framework for future assessment | Scenarios for future assessment                                                                                                  |
|------------------------------------------|------------------------------|-----------------------------------------------------|--------------------------------------------------------------|-----------------------|------------------------------------------|----------------------------------------------------------------------------------------------------------------------------------|
| <b>This study</b>                        | Exposure of urban population | Global                                              | Both water withdrawal and water availability were considered | Evaluated             | IPCC-CMIP6                               | SSP1&RCP2.6; SSP2&RCP4.5; SSP3&RCP7.0; SSP5&RCP8.5                                                                               |
| <b>McDonald et al., 2011, Ambio</b>      | Exposure of urban population | Cities greater than 50,000 in population            | Water withdrawal was not considered                          | Not evaluated         | N/A                                      | N/A                                                                                                                              |
| <b>McDonald et al., 2011, PNAS</b>       | Exposure of urban population | Cities in developing countries with >100,000 people | Water withdrawal was not considered                          | Evaluated             | MEA                                      | Adaptive Management; Global Orchestration; Order from Strength; Technogarden                                                     |
| <b>McDonald et al., 2014, GEC</b>        | Exposure of urban population | Urban agglomerations greater than 750,000 people    | Both water withdrawal and water availability were considered | Not evaluated         | N/A                                      | N/A                                                                                                                              |
| <b>Padowski and Gorelick, 2014, ERL</b>  | Exposure of cities           | 70 cities with populations exceeding 750,000        | Both water withdrawal and water availability were considered | Evaluated             | Self-defined                             | Urban population growth and agricultural expansion under normal climate conditions                                               |
| <b>Flörke et al., 2018, NS</b>           | Exposure of urban population | 482 cities containing 736 million people in 2018    | Both water withdrawal and water availability were considered | Evaluated             | IPCC-CMIP5                               | SSP2&RCP6.0                                                                                                                      |
| <b>Mekonnen and Hoekstra, 2016, SA</b>   | Exposure of total population | Global                                              | Both water withdrawal and water availability were considered | Not evaluated         | N/A                                      | N/A                                                                                                                              |
| <b>Veldkamp et al., 2017, NC</b>         | Exposure of total population | Global                                              | Both water withdrawal and water availability were considered | Not evaluated         | N/A                                      | N/A                                                                                                                              |
| <b>Veldkamp et al., 2016, ERL</b>        | Exposure of total population | Global                                              | Water withdrawal was not considered                          | Evaluated             | IPCC-CMIP5                               | SSP1&RCP2.6; SSP3&RCP6.0; SSP5&RCP8.5                                                                                            |
| <b>Wada et al., 2014, NG</b>             | Exposure of total population | Global                                              | Both water withdrawal and water availability were considered | Evaluated             | IPCC-CMIP5                               | SSP2&RCPs                                                                                                                        |
| <b>Schewe et al., 2014, PNAS</b>         | Exposure of total population | Global                                              | Water withdrawal was not considered                          | Evaluated             | IPCC-CMIP5                               | SSP2&RCP8.5                                                                                                                      |
| <b>Hanasaki et al., 2013b, HESS</b>      | Exposure of total population | Global                                              | Both water withdrawal and water availability were considered | Evaluated             | IPCC-CMIP5                               | SSP1&RCP2.6; SSP1&RCP6.0; SSP2&RCP4.5; SSP2&RCP8.5; SSP3&RCP6.0; SSP3&RCP8.5; SSP4&RCP2.6; SSP4&RCP6.0; SSP5&RCP6.0; SSP5&RCP8.5 |
| <b>Arnell and Lloyd-Hughes, 2014, CC</b> | Exposure of total population | Global                                              | Water withdrawal was not considered                          | Evaluated             | IPCC-CMIP5                               | Five SSP×Four RCPs                                                                                                               |

Note: Green color denotes the merit on estimation of global urban water scarcity.

**Supplementary Table 4. Results of this study and comparison with previous studies.**

|                                          | Total/urban population | Criterion                                                 | Unit for assessment                                                                                   | Estimated period             | Seasonal (billion)*          | Perennial (billion)**        | Total (billion)***                               | Percentage****                                                           |
|------------------------------------------|------------------------|-----------------------------------------------------------|-------------------------------------------------------------------------------------------------------|------------------------------|------------------------------|------------------------------|--------------------------------------------------|--------------------------------------------------------------------------|
| <b>This study</b>                        | Urban                  | WSI > 1                                                   | Catchment                                                                                             | 2016<br>2050                 | 0.57<br>0.90-1.65            | 0.36<br>0.48-0.91            | 0.93<br>1.69-2.37                                | 32.53%<br>34.52%-<br>51.34%                                              |
| <b>McDonald et al., 2011, Ambio</b>      | Urban                  | Aridity index < 0.5                                       | Pixel                                                                                                 | 2000                         | N/A                          | N/A                          | 0.52                                             | 21.70%                                                                   |
| <b>McDonald et al., 2011, PNAS</b>       | Urban                  | Water availability < 100 L per person per day             | Urban extent<br>100-km buffer                                                                         | 2000<br>2050<br>2000<br>2050 | 0.89<br>3.10<br>0.31<br>1.30 | 0.15<br>0.99<br>0.02<br>0.15 | 1.04<br>4.09<br>0.33<br>1.45                     | 86.33%<br>97.45%<br>28.00%<br>34.40%                                     |
| <b>McDonald et al., 2014, GEC</b>        | Urban                  | WSI > 0.4                                                 | Urban agglomeration (Without infrastructure)<br>Urban agglomeration (With infrastructure)             | 2010                         | N/A                          | N/A                          | 0.59±0.06<br>0.38±0.06                           | 39±4%<br>25±4%                                                           |
| <b>Padowski and Gorelick, 2014, ERL</b>  | Number of cities       | WSI > 1                                                   | Basin                                                                                                 | 2010<br>2040                 | N/A<br>N/A                   | N/A<br>N/A                   | 25*****<br>31*****                               | 36%<br>44%                                                               |
| <b>Flörke et al., 2018, NS</b>           | Urban                  | WSI > 1                                                   | Subbasin (Without environmental flow requirements)<br>Subbasin (With environmental flow requirements) | 2000<br>2050<br>2000<br>2050 | N/A<br>N/A<br>N/A<br>N/A     | N/A<br>N/A<br>N/A<br>N/A     | 0.15-0.40<br>0.48-0.88<br>0.41-0.81<br>1.06-1.46 | 16.1%-<br>38.9%<br>27.6%-<br>44.0%<br>36.3%-<br>62.5%<br>46.6%-<br>67.8% |
| <b>Mekonnen and Hoekstra, 2016, SA</b>   | Total                  | WSI > 1                                                   | Pixel (1km)                                                                                           | 1996–<br>2005                | 3.72                         | 0.54                         | 4.26                                             | 71.00%                                                                   |
| <b>Veldkamp et al., 2017, NC</b>         | Total                  | WSI > 1                                                   | Pixel (0.5°)                                                                                          | 2010                         | N/A                          | N/A                          | 2.59                                             | 37.60%                                                                   |
| <b>Veldkamp et al., 2016, ERL</b>        | Total                  | Water availability < 1700 m <sup>3</sup> /capita per year | Water provinces                                                                                       | 2000<br>2050                 | N/A<br>N/A                   | N/A<br>N/A                   | 1.78<br>4.12-5.34                                | 38.00%<br>56.5%-<br>61.8%                                                |
| <b>Wada et al., 2014, NG</b>             | Total                  | WSI > 0.4                                                 | Watershed                                                                                             | 2000<br>2050                 | N/A<br>N/A                   | N/A<br>N/A                   | 1.9<br>3.68                                      | 31.70%<br>39.90%                                                         |
| <b>Schewe et al., 2014, PNAS</b>         | Total                  | Water availability < 1000 m <sup>3</sup> /capita per year | Country                                                                                               | 2000<br>2050                 | N/A<br>N/A                   | N/A<br>N/A                   | 0.18<br>2.04                                     | 3.00%<br>21.00%                                                          |
| <b>Hanasaki et al., 2013b, HESS</b>      | Total                  | WSI ≥ 0.4                                                 | Pixel (0.5°)                                                                                          | 2000<br>2050                 | N/A<br>N/A                   | N/A<br>N/A                   | 1.72<br>1.73-3.42                                | 28.29%<br>23%-39%                                                        |
| <b>Arnell and Lloyd-Hughes, 2014, CC</b> | Total                  | Water availability < 1000 m <sup>3</sup> /capita per year | Watershed                                                                                             | 2000<br>2050                 | N/A<br>N/A                   | N/A<br>N/A                   | 1.56<br>3.29-4.77                                | 25.59%<br>39.07%-<br>46.65%                                              |

\* The urban or total population facing seasonal water scarcity.

\*\* The urban or total population facing perennial water scarcity.

\*\*\* The urban or total population facing water scarcity.

\*\*\*\* The percentage of urban or total population facing water scarcity.

\*\*\*\*\* The number of cities.

**Supplementary Table 5. Potential solutions for addressing water scarcity of different cities\*.**

| Country      | City**                  | Population in 2016 (thousand) | Potential solutions |                           |                          |                        |                           |                              |                                                    | No solutions feasible |
|--------------|-------------------------|-------------------------------|---------------------|---------------------------|--------------------------|------------------------|---------------------------|------------------------------|----------------------------------------------------|-----------------------|
|              |                         |                               | SSP1&RCP2.6***      | Desalination of sea water | Groundwater exploitation | Reservoir construction | Interbasin water transfer | Domestic virtual water trade | International water transfer / virtual water trade |                       |
| Algeria      | El Djazair (Algiers)    | 2626                          | ○                   | ●                         | ●                        | ●                      | ●                         | ●                            | ●                                                  | ●                     |
| Angola       | Luanda                  | 7265                          | ○                   | ●                         | ●                        | ○                      | ●                         | ●                            | ○                                                  | ○                     |
| Argentina    | Córdoba                 | 1525                          | ●                   | ○                         | ●                        | ●                      | ●                         | ●                            | ●                                                  | ○                     |
| Armenia      | Yerevan                 | 1074                          | ○                   | ○                         | ●                        | ○                      | ●                         | ●                            | ●                                                  | ●                     |
| Australia    | Melbourne               | 4541                          | ○                   | ●                         | ○                        | ●                      | ●                         | ●                            | ●                                                  | ●                     |
|              | Brisbane                | 2254                          | ○                   | ●                         | ○                        | ●                      | ●                         | ●                            | ●                                                  | ●                     |
|              | Perth                   | 1926                          | ○                   | ●                         | ○                        | ●                      | ●                         | ●                            | ●                                                  | ●                     |
|              | Adelaide                | 1296                          | ○                   | ●                         | ●                        | ●                      | ●                         | ●                            | ●                                                  | ●                     |
| Azerbaijan   | Baku                    | 2233                          | ○                   | ●                         | ○                        | ○                      | ●                         | ●                            | ●                                                  | ●                     |
| Bangladesh   | Dhaka                   | 18234                         | ●                   | ●                         | ○                        | ○                      | ●                         | ●                            | ○                                                  | ○                     |
| Belgium      | Bruxelles-Brussel       | 2018                          | ○                   | ●                         | ○                        | ○                      | ●                         | ●                            | ●                                                  | ●                     |
|              | Antwerpen               | 1022                          | ○                   | ●                         | ○                        | ○                      | ●                         | ●                            | ●                                                  | ●                     |
| Brazil       | Sao Paulo               | 21136                         | ●                   | ●                         | ●                        | ●                      | ●                         | ●                            | ●                                                  | ●                     |
|              | Belo Horizonte          | 5826                          | ●                   | ○                         | ●                        | ●                      | ●                         | ●                            | ●                                                  | ●                     |
|              | Brasília                | 4267                          | ○                   | ○                         | ●                        | ●                      | ●                         | ●                            | ●                                                  | ●                     |
|              | Porto Alegre            | 4030                          | ●                   | ●                         | ●                        | ○                      | ●                         | ●                            | ●                                                  | ●                     |
|              | Recife                  | 3905                          | ●                   | ●                         | ●                        | ●                      | ●                         | ●                            | ●                                                  | ●                     |
|              | Fortaleza               | 3858                          | ○                   | ●                         | ●                        | ○                      | ●                         | ●                            | ●                                                  | ●                     |
|              | Salvador                | 3647                          | ●                   | ●                         | ●                        | ●                      | ○                         | ●                            | ●                                                  | ●                     |
|              | Campinas                | 3100                          | ●                   | ○                         | ●                        | ●                      | ●                         | ●                            | ●                                                  | ●                     |
|              | Grande Vitória          | 1918                          | ○                   | ●                         | ●                        | ●                      | ●                         | ●                            | ●                                                  | ●                     |
|              | Joao Pessoa             | 1308                          | ●                   | ●                         | ●                        | ●                      | ●                         | ●                            | ●                                                  | ●                     |
|              | Maceió                  | 1258                          | ○                   | ●                         | ●                        | ●                      | ●                         | ●                            | ●                                                  | ●                     |
| Bulgaria     | Sofia                   | 1261                          | ○                   | ○                         | ●                        | ●                      | ●                         | ●                            | ●                                                  | ●                     |
| Burkina Faso | Ouagadougou             | 2306                          | ○                   | ○                         | ●                        | ●                      | ●                         | ●                            | ○                                                  | ○                     |
| Cambodia     | Phnum Pénh (Phnom Penh) | 1835                          | ●                   | ○                         | ●                        | ○                      | ●                         | ●                            | ○                                                  | ○                     |
| Canada       | Calgary                 | 1398                          | ○                   | ○                         | ●                        | ●                      | ●                         | ●                            | ●                                                  | ●                     |
|              | Edmonton                | 1326                          | ●                   | ○                         | ●                        | ○                      | ●                         | ●                            | ●                                                  | ●                     |
| Chile        | Santiago                | 6575                          | ○                   | ○                         | ●                        | ○                      | ●                         | ●                            | ●                                                  | ●                     |
| China        | Shanghai                | 24163                         | ○                   | ●                         | ○                        | ●                      | ●                         | ●                            | ●                                                  | ●                     |
|              | Beijing                 | 18812                         | ○                   | ○                         | ○                        | ○                      | ●                         | ●                            | ●                                                  | ●                     |
|              | Tianjin                 | 12869                         | ○                   | ●                         | ○                        | ○                      | ●                         | ●                            | ●                                                  | ●                     |
|              | Xi'an, Shaanxi          | 6910                          | ○                   | ○                         | ○                        | ○                      | ●                         | ●                            | ●                                                  | ●                     |
|              | Hangzhou                | 6845                          | ○                   | ●                         | ○                        | ●                      | ●                         | ●                            | ●                                                  | ●                     |
|              | Shenyang                | 6636                          | ○                   | ○                         | ○                        | ○                      | ●                         | ●                            | ●                                                  | ●                     |
|              | Suzhou, Jiangsu         | 5652                          | ○                   | ●                         | ○                        | ●                      | ●                         | ●                            | ●                                                  | ●                     |
|              | Qingdao                 | 5152                          | ○                   | ●                         | ●                        | ○                      | ●                         | ●                            | ●                                                  | ●                     |
|              | Dalian                  | 4995                          | ●                   | ●                         | ●                        | ●                      | ●                         | ●                            | ●                                                  | ●                     |
|              | Ji'nan, Shandong        | 4755                          | ○                   | ○                         | ○                        | ●                      | ●                         | ●                            | ●                                                  | ●                     |
|              | Zhengzhou               | 4574                          | ○                   | ○                         | ○                        | ●                      | ●                         | ●                            | ●                                                  | ●                     |
|              | Changchun               | 4064                          | ○                   | ○                         | ●                        | ○                      | ●                         | ●                            | ●                                                  | ●                     |
|              | Kunming                 | 4026                          | ○                   | ○                         | ●                        | ●                      | ●                         | ●                            | ●                                                  | ●                     |
|              | Shijiazhuang            | 3793                          | ○                   | ○                         | ○                        | ○                      | ●                         | ●                            | ●                                                  | ●                     |
|              | ūrūmqi (Wulumqi)        | 3670                          | ○                   | ○                         | ○                        | ●                      | ●                         | ●                            | ●                                                  | ●                     |
|              | Taiyuan, Shanxi         | 3567                          | ○                   | ○                         | ●                        | ○                      | ●                         | ●                            | ●                                                  | ●                     |
|              | Wuxi, Jiangsu           | 3038                          | ○                   | ●                         | ○                        | ●                      | ●                         | ●                            | ●                                                  | ●                     |
|              | Tangshan, Hebei         | 2878                          | ○                   | ●                         | ○                        | ○                      | ●                         | ●                            | ●                                                  | ●                     |
|              | Zibo                    | 2475                          | ○                   | ○                         | ○                        | ●                      | ●                         | ●                            | ●                                                  | ●                     |
|              | Handan                  | 2338                          | ○                   | ○                         | ○                        | ○                      | ●                         | ●                            | ●                                                  | ●                     |
|              | Weifang                 | 2286                          | ○                   | ●                         | ○                        | ○                      | ●                         | ●                            | ●                                                  | ●                     |
|              | Yantai                  | 2197                          | ○                   | ●                         | ●                        | ○                      | ●                         | ●                            | ●                                                  | ●                     |
|              | Huai'an                 | 2197                          | ○                   | ○                         | ○                        | ●                      | ●                         | ●                            | ●                                                  | ●                     |
|              | Baotou                  | 2006                          | ●                   | ○                         | ●                        | ○                      | ●                         | ●                            | ●                                                  | ●                     |
|              | Hohhot                  | 1860                          | ○                   | ○                         | ○                        | ○                      | ●                         | ●                            | ●                                                  | ●                     |
|              | Baoding                 | 1806                          | ○                   | ○                         | ○                        | ○                      | ●                         | ●                            | ●                                                  | ●                     |
|              | Linyi, Shandong         | 1754                          | ○                   | ●                         | ○                        | ○                      | ●                         | ●                            | ●                                                  | ●                     |
|              | Daqing                  | 1670                          | ○                   | ○                         | ○                        | ○                      | ●                         | ●                            | ●                                                  | ●                     |
|              | Lianyungang             | 1591                          | ○                   | ●                         | ○                        | ○                      | ●                         | ●                            | ●                                                  | ●                     |
|              | Datong                  | 1576                          | ○                   | ○                         | ○                        | ○                      | ●                         | ●                            | ●                                                  | ●                     |
|              | Anshan                  | 1575                          | ○                   | ○                         | ●                        | ○                      | ●                         | ●                            | ●                                                  | ●                     |

|                                 |                                      |       |   |   |   |   |   |   |   |
|---------------------------------|--------------------------------------|-------|---|---|---|---|---|---|---|
|                                 | Putian                               | 1528  | ○ | ● | ● | ● | ● | ● | ● |
|                                 | Qiqihaer                             | 1475  | ● | ○ | ● | ○ | ● | ● | ● |
|                                 | Jining, Shandong                     | 1408  | ○ | ○ | ○ | ○ | ● | ● | ● |
|                                 | Yinchuan                             | 1391  | ○ | ○ | ● | ○ | ● | ● | ● |
|                                 | Xining                               | 1367  | ○ | ○ | ● | ● | ● | ● | ● |
|                                 | Qinhuangdao                          | 1333  | ○ | ● | ● | ● | ● | ● | ● |
|                                 | Zhangjiakou                          | 1302  | ○ | ○ | ● | ○ | ● | ● | ● |
|                                 | Fushun, Liaoning                     | 1296  | ○ | ○ | ● | ○ | ● | ● | ● |
|                                 | Taian, Shandong                      | 1245  | ○ | ○ | ● | ○ | ● | ● | ● |
|                                 | Anyang                               | 1203  | ○ | ○ | ○ | ○ | ● | ● | ● |
|                                 | Mianyang, Sichuan                    | 1183  | ● | ○ | ● | ● | ● | ● | ● |
|                                 | Zhanjiang                            | 1178  | ○ | ● | ● | ● | ● | ● | ● |
|                                 | Dongying                             | 1136  | ○ | ● | ○ | ○ | ● | ● | ● |
|                                 | Weihai                               | 1131  | ○ | ● | ● | ○ | ● | ● | ● |
|                                 | Rizhao                               | 1104  | ○ | ● | ● | ● | ● | ● | ● |
|                                 | Benxi                                | 1089  | ○ | ○ | ● | ○ | ● | ● | ● |
|                                 | Maoming                              | 1070  | ● | ● | ● | ● | ● | ● | ● |
|                                 | Yingkou                              | 1064  | ○ | ● | ● | ○ | ● | ● | ● |
|                                 | Jinzhou                              | 1058  | ○ | ● | ● | ● | ● | ● | ● |
|                                 | Chifeng                              | 1048  | ○ | ○ | ● | ● | ● | ● | ● |
|                                 | Zaozhuang                            | 1041  | ○ | ○ | ● | ○ | ● | ● | ● |
|                                 | Nanyang, Henan                       | 1035  | ○ | ○ | ● | ● | ● | ● | ● |
|                                 | Baoji                                | 1034  | ○ | ○ | ○ | ○ | ● | ● | ● |
|                                 | Pingdingshan, Henan                  | 1029  | ○ | ○ | ○ | ○ | ● | ● | ● |
|                                 | Jiaxing                              | 1026  | ○ | ● | ○ | ○ | ● | ● | ● |
|                                 | Xinxiang                             | 1010  | ○ | ○ | ○ | ○ | ● | ● | ● |
|                                 | Tengzhou                             | 1003  | ○ | ○ | ○ | ○ | ● | ● | ● |
| Cuba                            | La Habana (Havana)                   | 2128  | ○ | ● | ● | ● | ● | ● | ● |
| Dem. People's Republic of Korea | P'yongyang                           | 2993  | ● | ● | ● | ● | ● | ● | ○ |
| Dominican Republic              | Santo Domingo                        | 3019  | ● | ● | ● | ● | ○ | ● | ● |
| Egypt                           | Al-Qahirah (Cairo)                   | 19230 | ○ | ○ | ○ | ● | ● | ● | ○ |
|                                 | Al-Iskandariyah (Alexandria)         | 4886  | ○ | ● | ○ | ○ | ● | ● | ○ |
| El Salvador                     | San Salvador                         | 1102  | ● | ● | ● | ● | ● | ● | ○ |
| Ethiopia                        | Addis Ababa                          | 4040  | ● | ○ | ● | ● | ● | ● | ○ |
| France                          | Lille                                | 1046  | ○ | ● | ● | ○ | ● | ● | ● |
| Georgia                         | Tbilisi                              | 1078  | ● | ○ | ○ | ● | ● | ● | ● |
| Greece                          | Athínai (Athens)                     | 3159  | ○ | ● | ● | ● | ● | ● | ● |
| Guatemala                       | Ciudad de Guatemala (Guatemala City) | 2775  | ○ | ● | ● | ● | ● | ● | ● |
| Haiti                           | Port-au-Prince                       | 2503  | ● | ● | ● | ● | ○ | ● | ○ |
| India                           | Delhi                                | 26720 | ○ | ○ | ○ | ○ | ○ | ○ | ○ |
|                                 | Mumbai (Bombay)                      | 19535 | ● | ● | ● | ● | ○ | ○ | ○ |
|                                 | Bangalore                            | 10557 | ○ | ○ | ● | ○ | ○ | ○ | ○ |
|                                 | Chennai (Madras)                     | 9930  | ○ | ● | ● | ○ | ○ | ○ | ○ |
|                                 | Hyderabad                            | 8951  | ○ | ○ | ● | ○ | ○ | ○ | ○ |
|                                 | Ahmadabad                            | 7295  | ○ | ● | ○ | ○ | ○ | ○ | ○ |
|                                 | Surat                                | 5954  | ● | ● | ○ | ● | ○ | ○ | ○ |
|                                 | Pune (Poona)                         | 5917  | ○ | ● | ● | ● | ○ | ○ | ○ |
|                                 | Jaipur                               | 3520  | ○ | ○ | ● | ● | ○ | ○ | ○ |
|                                 | Lucknow                              | 3329  | ○ | ○ | ○ | ○ | ○ | ○ | ○ |
|                                 | Kanpur                               | 3036  | ○ | ○ | ○ | ○ | ○ | ○ | ○ |
|                                 | Kozhikode (Calicut)                  | 2810  | ● | ● | ● | ● | ○ | ○ | ○ |
|                                 | Nagpur                               | 2720  | ○ | ○ | ● | ● | ○ | ○ | ○ |
|                                 | Kochi (Cochin)                       | 2634  | ● | ● | ● | ● | ○ | ○ | ○ |
|                                 | Indore                               | 2627  | ○ | ○ | ● | ● | ○ | ○ | ○ |
|                                 | Malappuram                           | 2538  | ● | ● | ● | ● | ○ | ○ | ○ |
|                                 | Coimbatore                           | 2493  | ● | ○ | ● | ● | ○ | ○ | ○ |
|                                 | Thrissur                             | 2488  | ○ | ● | ● | ● | ○ | ○ | ○ |
|                                 | Patna                                | 2265  | ○ | ○ | ○ | ○ | ○ | ○ | ○ |
|                                 | Bhopal                               | 2163  | ○ | ○ | ● | ○ | ○ | ○ | ○ |
|                                 | Thiruvananthapuram                   | 2157  | ● | ● | ● | ● | ○ | ○ | ○ |
|                                 | Vadodara                             | 2027  | ○ | ● | ○ | ○ | ○ | ○ | ○ |
|                                 | Agra                                 | 2009  | ○ | ○ | ○ | ○ | ○ | ○ | ○ |
|                                 | Kannur                               | 1928  | ● | ● | ● | ● | ○ | ○ | ○ |
|                                 | Nashik                               | 1837  | ○ | ○ | ● | ● | ○ | ○ | ○ |
|                                 | Vijayawada                           | 1781  | ● | ● | ● | ● | ○ | ○ | ○ |
|                                 | Ludhiana                             | 1753  | ○ | ○ | ○ | ○ | ○ | ○ | ○ |
|                                 | Rajkot                               | 1655  | ○ | ● | ● | ○ | ○ | ○ | ○ |
|                                 | Madurai                              | 1616  | ○ | ● | ● | ● | ○ | ○ | ○ |
|                                 | Meerut                               | 1575  | ○ | ○ | ○ | ○ | ○ | ○ | ○ |
|                                 | Kollam                               | 1494  | ● | ● | ● | ● | ○ | ○ | ○ |

|                            |                                |       |   |   |   |   |   |   |   |
|----------------------------|--------------------------------|-------|---|---|---|---|---|---|---|
|                            | Jamshedpur                     | 1484  | ● | ○ | ● | ● | ○ | ○ | ○ |
|                            | Srinagar                       | 1442  | ○ | ○ | ● | ○ | ○ | ○ | ○ |
|                            | Raipur                         | 1400  | ○ | ○ | ● | ○ | ○ | ○ | ○ |
|                            | Aurangabad                     | 1393  | ○ | ○ | ● | ● | ○ | ○ | ○ |
|                            | Jabalpur                       | 1371  | ○ | ○ | ● | ○ | ○ | ○ | ○ |
|                            | Asansol                        | 1349  | ● | ○ | ● | ○ | ○ | ○ | ○ |
|                            | Jodhpur                        | 1321  | ○ | ○ | ● | ○ | ○ | ○ | ○ |
|                            | Allahabad                      | 1314  | ○ | ○ | ○ | ○ | ○ | ○ | ○ |
|                            | Ranchi                         | 1299  | ● | ○ | ● | ● | ○ | ○ | ○ |
|                            | Amritsar                       | 1292  | ○ | ○ | ○ | ○ | ○ | ○ | ○ |
|                            | Dhanbad                        | 1272  | ● | ○ | ● | ● | ○ | ○ | ○ |
|                            | Gwalior                        | 1255  | ○ | ○ | ○ | ○ | ○ | ○ | ○ |
|                            | Tiruppur                       | 1244  | ● | ○ | ● | ● | ○ | ○ | ○ |
|                            | Kota                           | 1210  | ○ | ○ | ● | ● | ○ | ○ | ○ |
|                            | Durg-Bhilainagar               | 1145  | ○ | ○ | ● | ● | ○ | ○ | ○ |
|                            | Bareilly                       | 1134  | ○ | ○ | ○ | ○ | ○ | ○ | ○ |
|                            | Mysore                         | 1112  | ○ | ○ | ● | ● | ○ | ○ | ○ |
|                            | Tiruchirappalli                | 1103  | ○ | ● | ● | ● | ○ | ○ | ○ |
|                            | Aligarh                        | 1074  | ○ | ○ | ○ | ○ | ○ | ○ | ○ |
|                            | Chandigarh                     | 1070  | ○ | ○ | ○ | ○ | ○ | ○ | ○ |
|                            | Moradabad                      | 1056  | ○ | ○ | ○ | ○ | ○ | ○ | ○ |
|                            | Hubli-Dharwad                  | 1040  | ○ | ○ | ● | ○ | ○ | ○ | ○ |
|                            | Bhubaneswar                    | 1037  | ○ | ● | ○ | ● | ○ | ○ | ○ |
|                            | Salem                          | 1020  | ● | ○ | ● | ● | ○ | ○ | ○ |
| Indonesia                  | Jakarta                        | 10287 | ● | ● | ● | ● | ● | ● | ○ |
|                            | Bekasi                         | 2934  | ● | ● | ● | ● | ● | ● | ○ |
|                            | Surabaya                       | 2868  | ○ | ● | ● | ○ | ● | ● | ○ |
|                            | Bandung                        | 2502  | ● | ● | ● | ● | ● | ● | ○ |
|                            | Depok                          | 2289  | ● | ● | ● | ● | ● | ● | ○ |
|                            | Tangerang                      | 2110  | ● | ● | ● | ● | ● | ● | ○ |
|                            | Semarang                       | 1737  | ○ | ● | ● | ● | ● | ● | ○ |
|                            | Bogor                          | 1072  | ● | ● | ● | ● | ● | ● | ○ |
| Iran (Islamic Republic of) | Tehran                         | 8667  | ○ | ○ | ○ | ○ | ○ | ○ | ● |
|                            | Mashhad                        | 2989  | ○ | ○ | ● | ○ | ○ | ○ | ● |
|                            | Esfahan                        | 1951  | ○ | ○ | ○ | ○ | ○ | ○ | ● |
|                            | Karaj                          | 1594  | ○ | ● | ○ | ○ | ○ | ○ | ● |
|                            | Shiraz                         | 1560  | ○ | ○ | ● | ○ | ○ | ○ | ● |
|                            | Tabriz                         | 1556  | ○ | ○ | ○ | ● | ○ | ○ | ● |
|                            | Qom                            | 1196  | ○ | ○ | ○ | ● | ○ | ○ | ● |
|                            | Ahvaz                          | 1181  | ○ | ● | ● | ○ | ○ | ○ | ● |
| Iraq                       | Baghdad                        | 6502  | ○ | ○ | ○ | ● | ● | ● | ● |
|                            | Al-Basrah (Basra)              | 1250  | ○ | ● | ○ | ○ | ● | ● | ● |
| Israel                     | Tel Aviv-Yafo (Tel Aviv-Jaffa) | 3803  | ○ | ● | ○ | ○ | ○ | ○ | ● |
|                            | Hefa (Haifa)                   | 1112  | ○ | ● | ○ | ○ | ○ | ○ | ● |
| Italy                      | Roma (Rome)                    | 4145  | ○ | ● | ● | ● | ● | ● | ● |
|                            | Napoli (Naples)                | 2202  | ○ | ● | ● | ● | ● | ● | ● |
| Jordan                     | Amman                          | 1872  | ○ | ● | ● | ○ | ○ | ○ | ● |
| Kenya                      | Nairobi                        | 4065  | ○ | ○ | ○ | ● | ● | ● | ○ |
|                            | Mombasa                        | 1139  | ○ | ● | ○ | ○ | ● | ● | ○ |
| Kuwait                     | Al Kuwait (Kuwait City)        | 2701  | ○ | ● | ○ | ○ | ○ | ○ | ● |
| Lebanon                    | Bayrut (Beirut)                | 2280  | ○ | ● | ● | ○ | ○ | ○ | ● |
| Libya                      | Tarabulus (Tripoli)            | 1142  | ○ | ● | ○ | ○ | ○ | ○ | ● |
| Mauritania                 | Nouakchott                     | 1105  | ○ | ● | ● | ○ | ● | ● | ○ |
| Mexico                     | Ciudad de México (Mexico City) | 21420 | ○ | ○ | ○ | ● | ● | ● | ● |
|                            | Monterrey                      | 4555  | ○ | ○ | ○ | ○ | ● | ● | ● |
|                            | Puebla                         | 3001  | ○ | ○ | ○ | ○ | ● | ● | ● |
|                            | Toluca de Lerdo                | 2243  | ○ | ○ | ○ | ○ | ● | ● | ● |
|                            | Tijuana                        | 1978  | ○ | ● | ● | ○ | ● | ● | ● |
|                            | León de los Aldamas            | 1736  | ○ | ○ | ○ | ○ | ● | ● | ● |
|                            | Ciudad Juárez                  | 1442  | ○ | ○ | ○ | ○ | ● | ● | ● |
|                            | La Laguna                      | 1370  | ○ | ○ | ○ | ○ | ● | ● | ● |
|                            | Querétaro                      | 1238  | ○ | ○ | ○ | ○ | ● | ● | ● |
|                            | San Luis Potosí                | 1143  | ○ | ○ | ○ | ○ | ● | ● | ● |
|                            | Mérida                         | 1083  | ○ | ● | ● | ○ | ● | ● | ● |
|                            | Mexicali                       | 1044  | ○ | ● | ○ | ○ | ○ | ● | ● |
|                            | Aguascalientes                 | 1034  | ○ | ○ | ○ | ○ | ● | ● | ● |
|                            | Cuernavaca                     | 1013  | ○ | ○ | ○ | ○ | ● | ● | ● |
| Mongolia                   | Ulaanbaatar                    | 1415  | ○ | ○ | ● | ● | ● | ● | ○ |
| Morocco                    | Dar-el-Beida (Casablanca)      | 3623  | ○ | ● | ● | ● | ● | ● | ○ |
|                            | Rabat                          | 1812  | ○ | ● | ● | ● | ● | ● | ○ |
|                            | Fès                            | 1146  | ● | ○ | ● | ● | ● | ● | ○ |
|                            | Tanger                         | 1036  | ○ | ● | ● | ● | ● | ● | ○ |



|                          |                                     |       |   |   |   |   |   |   |   |
|--------------------------|-------------------------------------|-------|---|---|---|---|---|---|---|
| Nepal                    | Kathmandu                           | 1227  | ○ | ○ | ● | ● | ● | ● | ○ |
| Nicaragua                | Managua                             | 1034  | ● | ● | ● | ● | ● | ● | ○ |
| Nigeria                  | Kano                                | 3661  | ○ | ○ | ● | ● | ● | ● | ○ |
| Oman                     | Masqat (Muscat)                     | 1312  | ○ | ● | ● | ○ | ○ | ○ | ● |
| Pakistan                 | Karachi                             | 14651 | ○ | ● | ● | ○ | ○ | ○ | ○ |
|                          | Lahore                              | 10808 | ○ | ○ | ○ | ○ | ○ | ○ | ○ |
|                          | Faisalabad                          | 3147  | ○ | ○ | ○ | ● | ○ | ○ | ○ |
|                          | Gujranwala                          | 1983  | ○ | ○ | ○ | ○ | ○ | ○ | ○ |
|                          | Multan                              | 1840  | ○ | ○ | ○ | ○ | ○ | ○ | ○ |
|                          | Hyderabad                           | 1707  | ● | ○ | ● | ● | ○ | ○ | ○ |
| Panama                   | Ciudad de Panamá (Panama City)      | 1709  | ○ | ● | ● | ● | ● | ● | ● |
| Peru                     | Lima                                | 10002 | ○ | ● | ● | ● | ● | ● | ● |
| Philippines              | Manila                              | 13064 | ○ | ● | ● | ● | ● | ● | ○ |
| Portugal                 | Lisboa (Lisbon)                     | 2898  | ○ | ● | ● | ● | ● | ● | ● |
|                          | Porto                               | 1302  | ○ | ● | ● | ● | ● | ● | ● |
| Republic of Korea        | Seoul                               | 9919  | ● | ● | ● | ○ | ● | ● | ● |
|                          | Incheon                             | 2711  | ● | ● | ● | ● | ● | ● | ● |
|                          | Daegu                               | 2236  | ● | ● | ● | ● | ● | ● | ● |
|                          | Daejeon                             | 1543  | ● | ● | ● | ● | ● | ● | ● |
|                          | Gwangju                             | 1507  | ● | ● | ● | ○ | ● | ● | ● |
|                          | Suweon                              | 1212  | ● | ● | ● | ● | ● | ● | ● |
| Romania                  | Bucuresti (Bucharest)               | 1840  | ○ | ○ | ● | ● | ● | ● | ● |
| Russian Federation       | Moskva (Moscow)                     | 12168 | ○ | ○ | ● | ○ | ● | ● | ● |
|                          | Yekaterinburg                       | 1447  | ○ | ○ | ● | ○ | ● | ● | ● |
|                          | Chelyabinsk                         | 1193  | ○ | ○ | ● | ● | ● | ● | ● |
|                          | Omsk                                | 1176  | ● | ○ | ● | ○ | ● | ● | ● |
|                          | Voronezh                            | 1034  | ● | ○ | ● | ○ | ● | ● | ● |
| Saudi Arabia             | Ar-Riyadh (Riyadh)                  | 6440  | ○ | ○ | ○ | ○ | ○ | ○ | ● |
|                          | Jiddah                              | 4163  | ○ | ● | ● | ○ | ○ | ○ | ● |
|                          | Makkah (Mecca)                      | 1851  | ○ | ● | ● | ○ | ○ | ○ | ● |
|                          | Al-Madinah (Medina)                 | 1341  | ○ | ○ | ● | ○ | ○ | ○ | ● |
|                          | Ad-Dammam                           | 1118  | ○ | ● | ○ | ○ | ○ | ○ | ● |
| Senegal                  | Dakar                               | 2830  | ○ | ● | ● | ○ | ● | ● | ○ |
| South Africa             | Johannesburg                        | 5147  | ○ | ○ | ● | ● | ● | ● | ● |
|                          | Cape Town                           | 4208  | ○ | ● | ○ | ○ | ● | ● | ● |
|                          | Ekurhuleni                          | 3559  | ○ | ○ | ● | ● | ● | ● | ● |
|                          | Pretoria                            | 2176  | ○ | ○ | ● | ● | ● | ● | ● |
|                          | Port Elizabeth (Nelson Mandela Bay) | 1198  | ○ | ● | ● | ● | ● | ● | ● |
| Spain                    | Madrid                              | 6312  | ○ | ○ | ● | ○ | ● | ● | ● |
|                          | Barcelona                           | 5348  | ● | ● | ● | ○ | ● | ● | ● |
| Sudan                    | Al-Khartum (Khartoum)               | 5260  | ○ | ○ | ● | ● | ● | ● | ○ |
| Syrian Arab Republic     | Dimashq (Damascus)                  | 2255  | ○ | ● | ● | ○ | ● | ● | ○ |
|                          | Halab (Aleppo)                      | 1600  | ○ | ○ | ● | ● | ○ | ○ | ○ |
|                          | Hims (Homs)                         | 1259  | ○ | ● | ● | ○ | ○ | ● | ○ |
| Thailand                 | Chon Buri                           | 1306  | ● | ● | ● | ● | ● | ● | ● |
|                          | Chiang Mai                          | 1090  | ○ | ○ | ● | ● | ● | ● | ● |
| Tunisia                  | Tunis                               | 2218  | ○ | ● | ● | ○ | ○ | ● | ○ |
| Turkey                   | Istanbul                            | 14332 | ○ | ● | ● | ● | ● | ● | ● |
|                          | Ankara                              | 4727  | ○ | ○ | ○ | ● | ● | ● | ● |
|                          | Izmir                               | 2885  | ○ | ● | ○ | ○ | ● | ● | ● |
|                          | Bursa                               | 1849  | ○ | ● | ○ | ● | ● | ● | ● |
|                          | Adana                               | 1692  | ○ | ● | ○ | ● | ● | ● | ● |
|                          | Gaziantep                           | 1561  | ● | ○ | ○ | ● | ● | ● | ● |
|                          | Konya                               | 1215  | ○ | ○ | ○ | ● | ● | ● | ● |
|                          | Antalya                             | 1116  | ○ | ● | ○ | ● | ● | ● | ● |
| Ukraine                  | Kharkiv                             | 1440  | ○ | ○ | ● | ○ | ● | ● | ○ |
| United Arab Emirates     | Dubayy (Dubai)                      | 2523  | ○ | ● | ○ | ○ | ○ | ○ | ● |
|                          | Ash-Shariqah (Sharjah)              | 1367  | ○ | ● | ○ | ○ | ○ | ○ | ● |
|                          | Abu Zaby (Abu Dhabi)                | 1271  | ○ | ● | ● | ○ | ○ | ○ | ● |
| United Kingdom           | London                              | 8788  | ● | ● | ● | ○ | ● | ● | ● |
| United States of America | New York-Newark                     | 18705 | ● | ● | ● | ● | ● | ● | ● |
|                          | Los Angeles-Long Beach-Santa Ana    | 12383 | ○ | ● | ● | ○ | ● | ● | ● |
|                          | Chicago                             | 8801  | ● | ● | ○ | ○ | ● | ● | ● |
|                          | Miami                               | 5902  | ● | ● | ● | ● | ● | ● | ● |
|                          | Dallas-Fort Worth                   | 5846  | ○ | ○ | ● | ● | ● | ● | ● |
|                          | Houston                             | 5807  | ○ | ● | ○ | ● | ● | ● | ● |
|                          | Atlanta                             | 5295  | ● | ○ | ● | ● | ● | ● | ● |
|                          | Phoenix-Mesa                        | 4169  | ○ | ○ | ○ | ○ | ● | ● | ● |
|                          | San Francisco-Oakland               | 3315  | ○ | ● | ● | ● | ● | ● | ● |
|                          | San Diego                           | 3148  | ○ | ● | ● | ○ | ● | ● | ● |
|                          | Denver-Aurora                       | 2656  | ○ | ○ | ○ | ● | ● | ● | ● |

|                                    |                                          |      |   |   |   |   |   |   |   |
|------------------------------------|------------------------------------------|------|---|---|---|---|---|---|---|
|                                    | Riverside-San Bernardino                 | 2258 | ○ | ● | ● | ○ | ● | ● | ● |
|                                    | San Antonio                              | 2096 | ○ | ○ | ● | ● | ● | ● | ● |
|                                    | Sacramento                               | 1969 | ○ | ○ | ○ | ● | ● | ● | ● |
|                                    | Orlando                                  | 1784 | ○ | ● | ○ | ● | ● | ● | ● |
|                                    | Austin                                   | 1763 | ○ | ○ | ● | ○ | ● | ● | ● |
|                                    | San Jose                                 | 1749 | ○ | ● | ● | ● | ● | ● | ● |
|                                    | Charlotte                                | 1706 | ● | ○ | ● | ○ | ● | ● | ● |
|                                    | Raleigh                                  | 1203 | ● | ○ | ● | ● | ● | ● | ● |
|                                    | Jacksonville, Florida                    | 1198 | ○ | ● | ○ | ● | ● | ● | ● |
|                                    | Richmond                                 | 1049 | ● | ● | ○ | ● | ● | ● | ● |
| Uzbekistan                         | Tashkent                                 | 2407 | ○ | ○ | ○ | ● | ● | ● | ○ |
| Venezuela (Bolivarian Republic of) | Caracas                                  | 2925 | ● | ● | ● | ● | ● | ● | ● |
|                                    | Maracaibo                                | 2093 | ○ | ● | ● | ● | ● | ● | ● |
|                                    | Valencia                                 | 1805 | ○ | ● | ● | ○ | ● | ● | ● |
|                                    | Barquisimeto                             | 1159 | ○ | ○ | ● | ● | ● | ● | ● |
|                                    | Maracay                                  | 1148 | ○ | ● | ● | ○ | ● | ● | ● |
| Viet Nam                           | Thành Pho Ho Chí Minh (Ho Chi Minh City) | 7605 | ○ | ● | ● | ● | ● | ● | ○ |
|                                    | Can Tho                                  | 1265 | ● | ● | ● | ● | ● | ● | ○ |
| Yemen                              | Sana'a'                                  | 2586 | ○ | ○ | ○ | ○ | ○ | ● | ○ |

\* The black dots denote that the solution is applicable and probably can solve the issue, the white dots denote that the solution is inapplicable or cannot solve the issue, the red dots denote that all the listed solutions are inapplicable or cannot solve the issue.

\*\* The cities with population above 1 million in 2016, which would face water scarcity in 2050 under at least one scenario, were listed. Sort by country and population from largest to smallest.

\*\*\* Including improvement of water-use efficiency, limitation of population growth, and mitigation of climate change.

**Supplementary Table 6. Spatial correlation on future urban expansion area between our estimates and existing datasets<sup>\*</sup>.**

| <b>Scenarios</b> | <b>GPFULE<sup>**</sup></b> | <b>GULFG<sup>**</sup></b> |
|------------------|----------------------------|---------------------------|
| SSP1             | 0.70 <sup>***</sup>        | 0.58 <sup>***</sup>       |
| SSP2             | 0.72 <sup>***</sup>        | 0.54 <sup>***</sup>       |
| SSP3             | 0.69 <sup>***</sup>        | 0.39 <sup>***</sup>       |
| SSP4             | 0.62 <sup>***</sup>        | 0.53 <sup>***</sup>       |
| SSP5             | 0.73 <sup>***</sup>        | 0.59 <sup>***</sup>       |

<sup>\*</sup>The correlation coefficients were listed. The catchment was used as the basic unit to calculate urban expansion area and perform correlation analyses.

<sup>\*\*</sup>GPFULE: global projections of future urban land expansion (Chen et al., 2020); GULFG: global 1/8-degree urban land fraction grids (Gao and O'Neill, 2020). According to data availability for different datasets, the urban expansion area between 2016 and 2050 in our estimates, the urban expansion area between 2015 and 2050 in GPFULE, and the urban expansion area between 2010 and 2050 in GULFG were used for correlation analyses.

<sup>\*\*\*</sup>P<0.001

**Supplementary Table 7. Comparison of urban population in cities with different sizes in 2016.**

| City size<br>(population)    | Total urban population (million) |        |            | Relative error |            |
|------------------------------|----------------------------------|--------|------------|----------------|------------|
|                              | United Nations                   | HYDE   | This study | HYDE           | This study |
| Megacities<br>(≥10 million)  | 480.91                           | 243.83 | 283.80     | -49.30%        | -40.99%    |
| Large cities<br>(≥1 million) | 1685.86                          | 784.80 | 1061.87    | -53.45%        | -37.01%    |
| All cities<br>(≥0.3 million) | 2364.58                          | 987.87 | 1607.37    | -58.22%        | -32.02%    |

**Supplementary Table 8. Impacts of interbasin water transfer on urban population facing water scarcity in 2016 (million persons).**

|                      | With interbasin water transfer |              |              | Without interbasin water transfer |              |              | Impacts of interbasin water transfer |             |              |
|----------------------|--------------------------------|--------------|--------------|-----------------------------------|--------------|--------------|--------------------------------------|-------------|--------------|
|                      | Peren.                         | Seas.        | Total        | Peren.                            | Seas.        | Total        | Peren.                               | Seas.       | Total        |
| <b>Asia</b>          | <b>268.0</b>                   | <b>340.8</b> | <b>608.8</b> | <b>273.6</b>                      | <b>340.6</b> | <b>614.3</b> | <b>-5.6</b>                          | <b>0.2</b>  | <b>-5.5</b>  |
| India                | 98.0                           | 124.1        | 222.1        | 98.0                              | 124.1        | 222.1        | 0                                    | 0           | 0            |
| China                | 72.1                           | 86.9         | 158.9        | 72.1                              | 92.2         | 164.2        | 0                                    | -5.3        | -5.3         |
| Pakistan             | 25.7                           | 14.2         | 39.9         | 31.3                              | 8.6          | 39.9         | -5.6                                 | 5.6         | 0            |
| Indonesia            | 0.0                            | 29.0         | 29.0         | 0.0                               | 29.0         | 29.0         | 0                                    | 0           | 0            |
| Philippines          | 0.0                            | 3.1          | 3.1          | 0.0                               | 3.1          | 3.1          | 0                                    | 0           | 0            |
| <b>Africa</b>        | <b>13.8</b>                    | <b>67.1</b>  | <b>80.9</b>  | <b>13.8</b>                       | <b>67.1</b>  | <b>80.9</b>  | <b>0</b>                             | <b>0</b>    | <b>0</b>     |
| Nigeria              | 0.6                            | 17.2         | 17.8         | 0.6                               | 17.2         | 17.8         | 0                                    | 0           | 0            |
| Egypt                | 1.7                            | 0.0          | 1.7          | 1.7                               | 0.0          | 1.7          | 0                                    | 0           | 0            |
| <b>North America</b> | <b>45.7</b>                    | <b>62.8</b>  | <b>108.5</b> | <b>60.9</b>                       | <b>52.7</b>  | <b>113.6</b> | <b>-15.2</b>                         | <b>10.1</b> | <b>-5.1</b>  |
| United States        | 24.0                           | 26.9         | 50.9         | 24.0                              | 32.1         | 56.1         | 0                                    | -5.2        | -5.2         |
| Mexico               | 21.6                           | 28.7         | 50.3         | 36.8                              | 13.5         | 50.3         | -15.2                                | 15.2        | 0            |
| <b>South America</b> | <b>7.7</b>                     | <b>28.8</b>  | <b>36.5</b>  | <b>7.7</b>                        | <b>28.8</b>  | <b>36.5</b>  | <b>0</b>                             | <b>0</b>    | <b>0</b>     |
| Brazil               | 0.1                            | 7.7          | 7.7          | 0.1                               | 7.7          | 7.7          | 0                                    | 0           | 0            |
| <b>Europe</b>        | <b>21.8</b>                    | <b>69.1</b>  | <b>90.9</b>  | <b>21.8</b>                       | <b>69.1</b>  | <b>90.9</b>  | <b>0</b>                             | <b>0</b>    | <b>0</b>     |
| <b>Oceania</b>       | <b>0.4</b>                     | <b>2.5</b>   | <b>2.8</b>   | <b>0.4</b>                        | <b>2.5</b>   | <b>2.8</b>   | <b>0</b>                             | <b>0</b>    | <b>0</b>     |
| <b>World</b>         | <b>359.3</b>                   | <b>573.4</b> | <b>932.7</b> | <b>380.1</b>                      | <b>563.3</b> | <b>943.3</b> | <b>-20.8</b>                         | <b>10.1</b> | <b>-10.6</b> |

### Supplementary References:

- Arnell, N. W., & Lloyd-Hughes, B. (2013). The global-scale impacts of climate change on water resources and flooding under new climate and socio-economic scenarios. *Climatic Change*, 122, 127-140. doi: 10.1007/s10584-013-0948-4
- Chen, G., Li, X., Liu, X., Chen, Y., Liang, X., Leng, J., Xu, X., Liao, W., Qiu, Y., Wu, Q., & Huang, K. (2020). Global projections of future urban land expansion under shared socioeconomic pathways. *Nature Communications*, 11, 537. doi: 10.1038/s41467-020-14386-x
- Flörke, M., Schneider, C., & McDonald, R. I. (2018). Water competition between cities and agriculture driven by climate change and urban growth. *Nature Sustainability*, 1, 51-58. doi: 10.1038/s41893-017-0006-8
- Gao, J., & O'Neill, B. C. (2020). Mapping global urban land for the 21st century with data-driven simulations and Shared Socioeconomic Pathways. *Nat Commun*, 11, 2302. doi: 10.1038/s41467-020-15788-7
- Gottelman, A., Hannay, C., Bacmeister, J. T., Neale, R. B., Pendergrass, A. G., Danabasoglu, G., Lamarque, J. F., Fasullo, J. T., Bailey, D. A., Lawrence, D. M., & Mills, M. J. (2019a). High Climate Sensitivity in the Community Earth System Model Version 2 (CESM2). *Geophysical Research Letters*, 46, 8329-8337. doi: 10.1029/2019GL083978
- Gottelman, A., Mills, M. J., Kinnison, D. E., Garcia, R. R., Smith, A. K., Marsh, D. R., Tilmes, S., Vitt, F., Bardeen, C. G., McInerney, J., Liu, H. L., Solomon, S. C., Polvani, L. M., Emmons, L. K., Lamarque, J. F., Richter, J. H., Glanville, A. S., Bacmeister, J. T., Phillips, A. S., Neale, R. B., Simpson, I. R., DuVivier, A. K., Hodzic, A., & Randel, W. J. (2019b). The Whole Atmosphere Community Climate Model Version 6 (WACCM6). *Journal of Geophysical Research: Atmospheres*, 124, 12380-12403. doi: 10.1029/2019JD030943
- Hanasaki, N., Fujimori, S., Yamamoto, T., Yoshikawa, S., Masaki, Y., Hijioka, Y., Kainuma, M., Kanamori, Y., Masui, T., Takahashi, K., & Kanae, S. (2013a). A global water scarcity assessment under Shared Socio-economic Pathways - Part 1: Water use. *Hydrology and Earth System Sciences*, 17, 2375-2391. doi: 10.5194/hess-17-2375-2013
- Hanasaki, N., Fujimori, S., Yamamoto, T., Yoshikawa, S., Masaki, Y., Hijioka, Y., Kainuma, M., Kanamori, Y., Masui, T., Takahashi, K., & Kanae, S. (2013b). A global water scarcity assessment under Shared Socio-economic Pathways - Part 2: Water availability and scarcity. *Hydrology and Earth System Sciences*, 17, 2393-2413. doi: 10.5194/hess-17-2393-2013
- He, C., Okada, N., Zhang, Q., Shi, P., & Li, J. (2008). Modelling dynamic urban expansion processes incorporating a potential model with cellular automata. *Landscape and Urban Planning*, 86, 79-91. doi: 10.1016/j.landurbplan.2007.12.010
- He, C., Zhao, Y., Huang, Q., Zhang, Q., & Zhang, D. (2015). Alternative future analysis for assessing the potential impact of climate change on urban landscape dynamics. *Science of the Total Environment*, 532, 48-60. doi: 10.1016/j.scitotenv.2015.05.103
- He, C., Liu, Z., Gou, S., Zhang, Q., Zhang, J., & Xu, L. (2019). Detecting global urban expansion over the last three decades using a fully convolutional network. *Environmental Research Letters*, 14, 034008. doi: 10.1088/1748-9326/aaf936
- Hofste, R. W., Kuzma, S., Walker, S., Sutanudjaja, E. H., Bierkens, M. F. P., Kuijper, M. J. M., Sanchez, M. F., Beek, R. V., Wada, Y., Rodríguez, S. G., & Reig, A. P. (2019). AQUEDUCT

- 3.0: Updated decision-relevant global water risk indicators. In. Washington, DC: World Resources Institute. doi: 10.46830/writn.18.00146
- Klein Goldewijk, K., Beusen, A., & Janssen, P. (2010). Long-term dynamic modeling of global population and built-up area in a spatially explicit way-HYDE 3.1. The Holocene, 20, 565–573. doi: 10.1177/0959683609356587
- Klein Goldewijk, K., Beusen, A., Doelman, J., & Stehfest, E. (2017). New anthropogenic land use estimates for the Holocene-HYDE 3.2. Earth System Science Data, 9, 927–953. doi: 10.5194/essd-9-927-2017
- Krasting, J. P., John, J. G., Blanton, C., McHugh, C., Nikonov, S., Radhakrishnan, A., et al. (2018). NOAA-GFDL GFDL-ESM4 model output prepared for CMIP6 CMIP. Earth System Grid Federation. doi: 10.22033/ESGF/CMIP6.1407
- Lehner, B., Liermann, C. R., Revenga, C., Vörösmarty, C., Fekete, B., Crouzet, P., Döll, P., Endejan, M., Frenken, K., Magome, J., Nilsson, C., Robertson, J. C., Rodel, R., Sindorf, N., & Wisser, D. (2011). High-resolution mapping of the world's reservoirs and dams for sustainable river-flow management. *Frontiers in Ecology and the Environment*, 9, 494-502. doi: 10.1890/100125
- Liu, Z., Yang, Y., He, C., & Tu, M. (2019). Climate change will constrain the rapid urban expansion in drylands: A scenario analysis with the zoned Land Use Scenario Dynamics-urban model. *Science of the Total Environment*, 651, 2772-2786. doi: 10.1016/j.scitotenv.2018.10.177
- McDonald, R. I., Douglas, I., Revenga, C., Hale, R., Grimm, N., Grönwall, J., & Fekete, B. (2011). Global Urban Growth and the Geography of Water Availability, Quality, and Delivery. *Ambio*, 40, 437-446. doi: 10.1007/s13280-011-0152-6
- McDonald, R. I., Green, P., Balk, D., Fekete, B. M., Revenga, C., Todd, M., & Montgomery, M. (2011). Urban growth, climate change, and freshwater availability. *Proceedings of the National Academy of Sciences of the United States of America*, 108, 6312-6317. doi: 10.1073/pnas.1011615108
- McDonald, R. I., Weber, K., Padowski, J., Flörke, M., Schneider, C., Green, P. A., Gleeson, T., Eckman, S., Lehner, B., Balk, D., Boucher, T., Grill, G., & Montgomery, M. (2014). Water on an urban planet: Urbanization and the reach of urban water infrastructure. *Global Environmental Change*, 27, 96-105. doi: 10.1016/j.gloenvcha.2014.04.022
- Mekonnen, M. M., & Hoekstra, A. Y. (2016). Four billion people facing severe water scarcity. *Sci Adv*, 2, e1500323. doi: 10.1126/sciadv.1500323
- Müller, W. A., Jungclaus, J. H., Mauritsen, T., Baehr, J., Bittner, M., Budich, R., Bunzel, F., Esch, M., Ghosh, R., Haak, H., Ilyina, T., Kleine, T., Kornblueh, L., Li, H., Modali, K., Notz, D., Pohlmann, H., Roeckner, E., Stemmler, I., Tian, F., & Marotzke, J. (2018). A Higher-resolution Version of the Max Planck Institute Earth System Model (MPI-ESM1.2-HR). *Journal of Advances in Modeling Earth Systems*, 10, 1383-1413. doi: 10.1029/2017MS001217
- Padowski, J. C., & Gorelick, S. M. (2014). Global analysis of urban surface water supply vulnerability. *Environmental Research Letters*, 9, 104004. doi: 10.1088/1748-9326/9/10/104004

- Rong, X., Li, J., Chen, H., et al. (2019). Introduction of CAMS-CSM model and its participation in CMIP6. *Climate Change Research*, 15 (5), 540-544. doi: 10.12006/j.issn.1673-1719.2019.186 (In Chinese)
- Schewe, J., Heinke, J., Gerten, D., Haddeland, I., Arnell, N. W., Clark, D. B., Dankers, R., Eisner, S., Fekete, B.M., Colón-González, F.J., Gosling, S.N., Kim, H., Liu, X., Masaki, Y., Portmann, F.T., Satoh, Y., Stacke, T., Tang, Q., Wada, Y., Wisser, D., Albrecht, T., Frieler, K., Piontek, F., Warszawski, L., & Kabat, P. (2014). Multimodel assessment of water scarcity under climate change. *Proceedings of the National Academy of Sciences*, 111, 3245-3250. doi: 10.1073/pnas.1222460110
- Schneider, A., Jost, A., Coulon, C., Silvestre, M., Théry, S., & Ducharne, A. (2017). Global-scale river network extraction based on high-resolution topography and constrained by lithology, climate, slope, and observed drainage density. *Geophysical Research Letters*, 44, 2773-2781. doi: 10.1002/2016gl071844
- Veldkamp, T. I. E., Wada, Y., Aerts, J., Doll, P., Gosling, S. N., Liu, J., Masaki, Y., Oki, T., Ostberg, S., Pokhrel, Y., Satoh, Y., Kim, H., & Ward, P. J. (2017). Water scarcity hotspots travel downstream due to human interventions in the 20th and 21st century. *Nature Communications*, 8, 12. doi: 10.1038/ncomms15697
- Veldkamp, T. I. E., Wada, Y., Aerts, J., & Ward, P. J. (2016). Towards a global water scarcity risk assessment framework: incorporation of probability distributions and hydro-climatic variability. *Environmental Research Letters*, 11, 12. doi: 10.1088/1748-9326/11/2/024006
- Volodin, E. M., Mortikov, E. V., Kostykin, S. V., Galin, V. Y., Lykossov, V. N., Gritsun, A. S., Diansky, N. A., Gusev, A. V., & Iakovlev, N. G. (2017). Simulation of the present-day climate with the climate model INMCM5. *Climate Dynamics*, 49, 3715-3734. doi: 10.1007/s00382-017-3539-7
- Wada, Y., Gleeson, T., & Esnault, L. (2014). Wedge approach to water stress. *Nature Geoscience*, 7, 615-617. doi: 10.1038/ngeo2241
- Wyser, K., van Noije, T., Yang, S., von Hardenberg, J., O'Donnell, D., & Döscher, R. (2019). On the increased climate sensitivity in the EC-Earth model from CMIP5 to CMIP6. *Geosci. Model Dev. Discuss.*, 2019, 1-13. doi: 10.5194/gmd-2019-282
- Xin X., Wu T., Zhang J., et al. (2019). Introduction of BCC models and its participation in CMIP6. *Climate Change Research*, 15 (5), 533-539. doi: 10.12006/j.issn.1673-1719.2019.039 (In Chinese)
- Yukimoto, S., Kawai, H., Koshiro, T., Oshima, N., Yoshida, K., Urakawa, S., Tsujino, H., Deushi, M., Tanaka, T., Hosaka, M., Yabu, S., Yoshimura, H., Shindo, E., Mizuta, R., Obata, A., Adachi, Y., & Ishii, M. (2019). The Meteorological Research Institute Earth System Model Version 2.0, MRI-ESM2.0: Description and Basic Evaluation of the Physical Component. *Journal of the Meteorological Society of Japan. Ser. II*, 97, 931-965. doi: 10.2151/jmsj.2019-051
